# Supplementary material for: Exploring the chemical dynamics of phenanthrene (C14H10) formation via the bimolecular gas-phase reaction of the phenylethynyl radical (C6H5CC) with benzene (C6H6)
Source: Royal Society of Chemistry journal article supplement (doi:10.1039/d3fd00159h), 2024-01-01
Supplement: d3fd00159h1.pdf [file d3fd00159h1.pdf]

Supplementary Information for

**Exploring the Chemical Dynamics of Phenanthrene (C<sub>14</sub>H<sub>10</sub>) Formation via  
the Bimolecular Gas-Phase Reaction of the Phenylethynyl Radical (C<sub>6</sub>H<sub>5</sub>CC)  
with Benzene (C<sub>6</sub>H<sub>6</sub>)**

**Authors and Affiliations:** Shane J. Goettl<sup>a</sup>, Zhenghai Yang<sup>a</sup>, Chao He<sup>a</sup>, Ankit Somani<sup>b</sup>, Adrian Portela-Gonzalez<sup>b</sup>, Wolfram Sander<sup>b\*</sup>, Alexander M. Mebel<sup>c\*</sup>, Ralf I. Kaiser<sup>a\*</sup>

<sup>a</sup> Department of Chemistry, University of Hawaii at Manoa, Honolulu, Hawaii 96822, USA

Email: [ralfk@hawaii.edu](mailto:ralfk@hawaii.edu)

<sup>b</sup> Lehrstuhl für Organische Chemie II, Ruhr-Universität Bochum, 44801 Bochum, Germany

Email: [wolfram.sander@rub.de](mailto:wolfram.sander@rub.de)

<sup>c</sup> Department of Chemistry and Biochemistry, Florida International University, Miami, Florida 33199, USA

Email: [mebela@fiu.edu](mailto:mebela@fiu.edu)

## Precursor Synthesis and Characterization

The synthesis of (2-bromoethynyl)benzene was performed analogously to a reported procedure<sup>1</sup> with an increase in the concentration of the starting materials due to the large scale of precursor needed. Regarding the purification, batches performed with less than 10 g of phenylacetylene could be purified by either column chromatography or distillation for both precursors whereas larger batches (20–50 g) decomposed before affording the desired product and, thus, had to be purified by column chromatography. A solution of phenylacetylene (8.0 mL, 7.44 g, 72 mmol) in MeOH (50 mL) was cooled down to 0 °C and KOH (10.0 g, 180 mmol) was added. After 20 min of stirring at 0 °C, N-bromosuccinimide (15.3 g, 86 mmol) was added to the mixture in portions and stirred at 0 °C for 15 min. The cold bath was replaced by a rt water bath and the mixture was stirred for 30 min. Then, Et<sub>2</sub>O (200 mL) was added and the mixture was extracted with brine (3 x 100 mL), dried over MgSO<sub>4</sub>, filtered and evaporated to afford a brown oil/liquid. This liquid was purified by column chromatography (SiO<sub>2</sub>; hexane) to afford the product as a light-yellow oil (9.63 g, 73%). <sup>1</sup>H NMR (200 MHz, CDCl<sub>3</sub>) δ: 7.44 (dd, 2H), 7.31 (m, 3H) ppm. <sup>13</sup>C NMR (50 MHz, CDCl<sub>3</sub>) δ: 132.10, 128.78, 128.44, 122.78, 80.19 and 49.93 ppm. MS: m/z 180.0 [M<sup>+</sup>] 101.1 [M<sup>+</sup>–Br]. The characteristic C≡C stretching vibration was found at 2202 cm<sup>-1</sup> whereas for the starting material it is observed at 2110 cm<sup>-1</sup>. The provided characterization is in accordance with the literature.<sup>2</sup> <sup>1</sup>H and <sup>13</sup>C NMR data were recorded with a Bruker DPX-200 NMR spectrometer referenced towards CDCl<sub>3</sub> (7.26 ppm for <sup>1</sup>H NMR and 77.16 ppm for <sup>13</sup>C NMR). The GC-MS data were recorded with an Agilent 7820A GC spectrometer. IR data were recorded with a Bruker Equinox 55 FT-IR spectrometer.

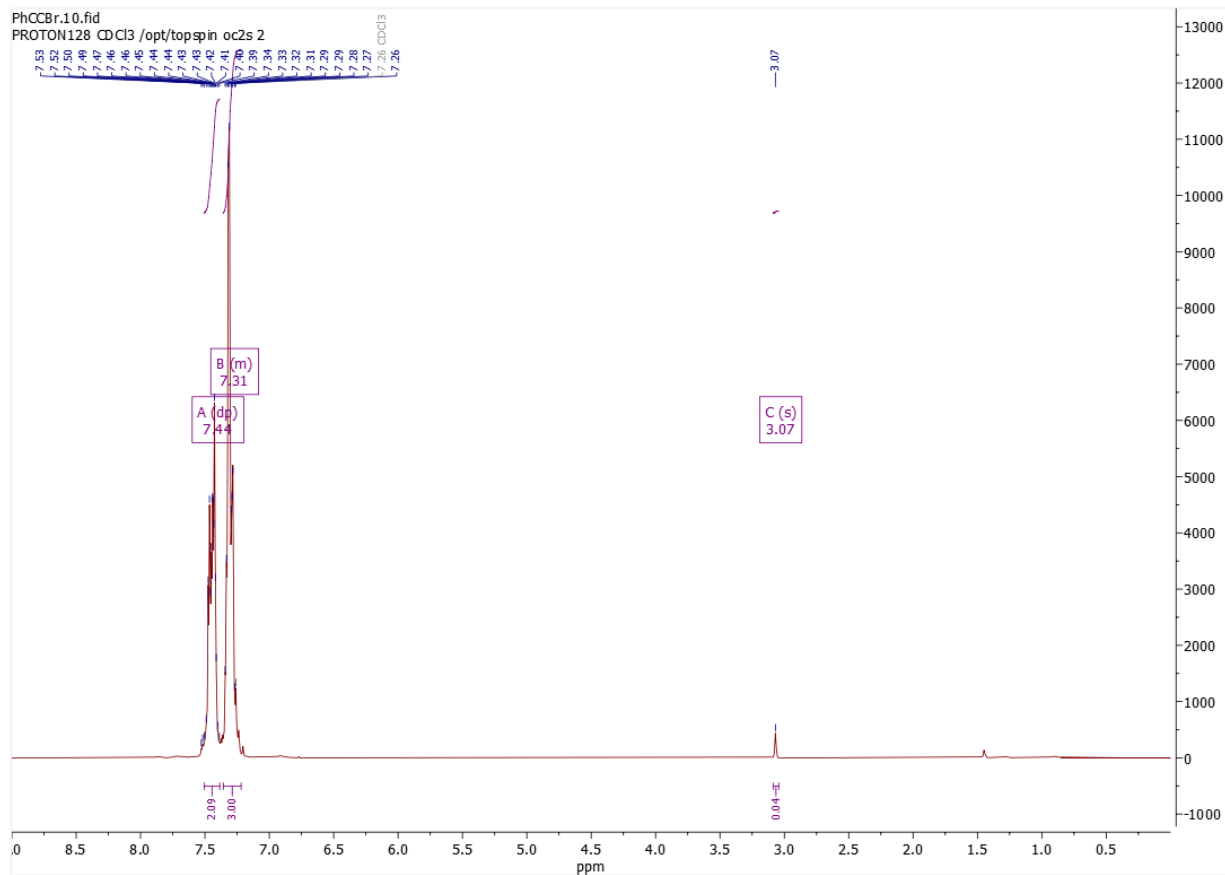

**Fig. S1** <sup>1</sup>H NMR spectrum of (2-bromoethynyl)benzene. A small impurity of phenylacetylene is still observed at 3.07 ppm and was later removed by distillation.

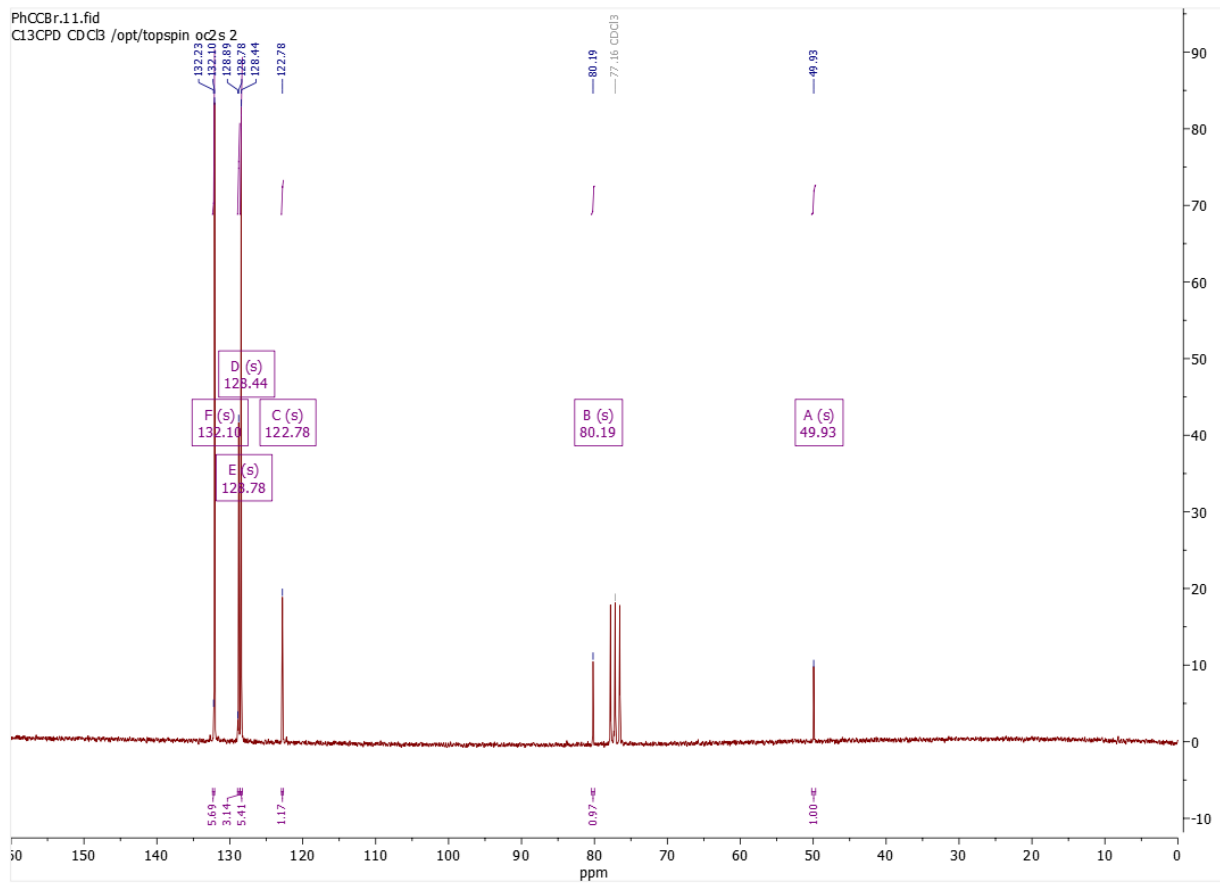

**Fig. S2**  $^{13}\text{C}$  NMR spectrum of (2-bromoethynyl)benzene.

## Supplementary References

- 1 M. V. Russo, C. Lo Sterzo, P. Franceschini, G. Biagini and A. Furlani, *J. Organomet. Chem.*, 2001, **619**, 49-61.
- 2 M. X.-W. Jiang, M. Rawat and W. D. Wulff, *J. Am. Chem. Soc.*, 2004, **126**, 5970-5971.
